# Supplementary material
Source: publisher figshare collection journal article supplement (https://acs.figshare.com/ndownloader/files/14606903)
Supplement: Supplementary file 1 [file 14606903]

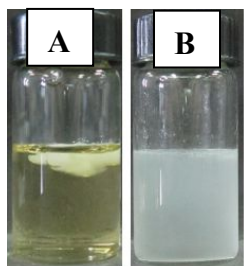

Fig. 1S. The dispersion of the HIPEs in the oil (A) and water (B).

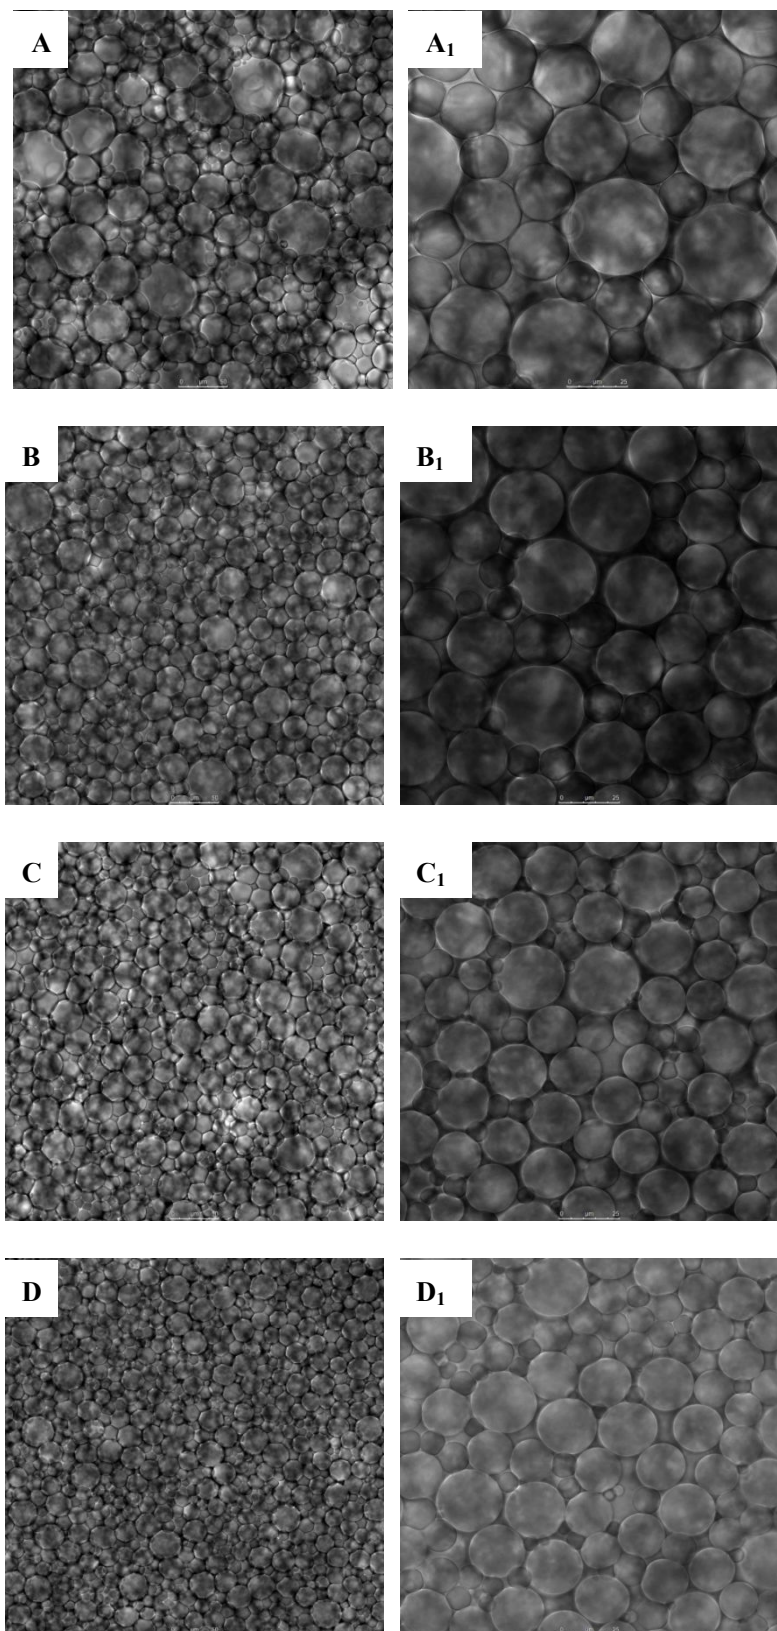

Fig. 2S. Microscopy images of GCCPs-stabilized HIPEs at fixed hexane fraction of 80% as a function of particle concentrations: 0.5% (A), 1.0% (B), 2.0% (C), 3.0% (D), and A<sub>1</sub> B<sub>1</sub> C<sub>1</sub> D<sub>1</sub> are the magnification images of ABCD, left side scale bar: 50 μm,

right side scale bar: 25  $\mu\text{m}$ .
